# Supplementary material
Source: publisher figshare collection journal article supplement (https://acs.figshare.com/ndownloader/files/3749563)
Supplement: Supplementary file 1 [file 3749563]

## Supporting Information

# Shape-controlled fabrication of the polymer-based micromotor based on the polydimethylsiloxane template

*Miaoda Su, Mei Liu, Limei Liu, Yunyu Sun, Mingtong Li, Dalei Wang, Hui Zhang, Bin Dong\**

Institute of Functional Nano & Soft Materials (FUNSOM), Jiangsu Key Laboratory for Carbon-Based Functional Materials & Devices and Collaborative Innovation Center (CIC) of Suzhou Nano Science and Technology, Soochow University, Suzhou 215123 (P. R. China), E-mail: bdong@suda.edu.cn

**Video S1** The autonomous motion of one solid cylindrical Pt-PCL micromotor (10  $\mu\text{m}$  in diameter and 24  $\mu\text{m}$  in length) in the  $\text{H}_2\text{O}_2$  aqueous solution.

**Video S2** The autonomous motion showing one solid cylindrical Pt-PCL micromotor (60  $\mu\text{m}$  in diameter and 24  $\mu\text{m}$  in height) in the  $\text{H}_2\text{O}_2$  aqueous solution.

**Video S3** The fluorescence video showing the controlled movement of one solid cylindrical Pt-PCL<sub>circle-60-0.4</sub> containing  $\text{Fe}_3\text{O}_4\text{NP}$  and R6G in the  $\text{H}_2\text{O}_2$  aqueous solution.

**Video S4** The autonomous and controlled movement of a hollow cup-like Pt-PCL- $\text{Fe}_3\text{O}_4$  micromotor in the  $\text{H}_2\text{O}_2$  aqueous solution.

**Video S5** The cargo manipulation based on the hollow cup-like Pt-PCL- $\text{Fe}_3\text{O}_4$  structure. The cargo is the PCL microsphere.
